# Supplementary material for: A sensory integration account for time perception
Source: PubMed Central journal article supplement (PMC7875380; doi:10.1371/journal.pcbi.1008668), 2021-01-29
Supplement: pcbi.1008668.s010.pdf [file pcbi.1008668.s010.pdf]

# 1 Discrimination task with supplementary auditory noise

2

## 3 RESULTS

4 Fig 6G showed that, in order to reproduce the behavioral results, the duration leaky integrator needs  
5 to integrate a lower proportion of *I*-coding neurons with a higher amount of neuronal noise, as  
6 compared to the intensity leaky integrator. One possible interpretation of this result is that the duration  
7 leaky integrator integrates input from sensory areas beyond vS1. In our simulation, we can replicate  
8 the non-vS1 input by including non-*I*-coding neurons. This hypothesis is motivated by the fact that  
9 time perception is a supramodal process; all sensory channels are connected with the same sense of  
10 time [1], and the durations of multimodal (audio-visual) stimuli are known to be perceived as longer  
11 than unimodal ones [2].

12

13 We asked whether the hypothesis that the duration percept is generated by integration of sensory  
14 channels beyond those of the tactile stimulus itself could be generalized to humans. As a test, human  
15 subjects again performed the delayed comparison task; in half the trials, the tactile stimuli to be judged  
16 were accompanied by non-informative acoustic noise played through headphones (S8A Fig). Each  
17 session tested one percept, either intensity or duration.

18

19 If the irrelevant acoustic noise is integrated by both the duration and intensity leaky integrators, it  
20 will “dilute,” the influence of *I*-coding neurons. In the intensity delayed comparison task this would  
21 result in a decrease in performance while in the duration delayed comparison task this would result  
22 in a reduction of the *I*-dependent bias.

23

24 The presence or absence of noise did not affect accuracy in either task (S8B Fig; Kruskal-Wallis test,  
25  $p = 0.72$  Bayes Factor = 3.07 for the duration task,  $p = 0.66$  , Bayes Factor = 2.02 for the intensity  
26 task). To quantify the bias induced by the non-relevant feature on the perception of the relevant

27 feature, as before we measured the shift of the PSE of psychometric curves caused by the non-relevant  
28 feature (see Methods). S8C Fig, shows that in the duration comparison task, the bias induced by *I*  
29 was significantly different between the “noise on” and “noise off” conditions (one sample, one-tailed  
30 Wilcoxon signed rank test,  $p = 0.0273$ ), whereas in the intensity comparison task the bias induced  
31 by duration was *not* significantly different between the “noise on” and “noise off” conditions (one  
32 sample, one-tailed Wilcoxon signed rank test,  $p = 0.5$ ). These results are not consistent with the  
33 findings predicted if both integrators were influenced by the non-relevant stimulus feature. Instead,  
34 they are consistent with the hypothesis that the irrelevant acoustic noise is integrated within the  
35 sensory drive of the duration leaky integrator, but not by the intensity leaky integrator.

36

## 37 **MATERIAL AND METHODS**

38

### 39 **Stimulus generation**

40 The acoustic noise was generated by stringing together sequential amplitude values at 10,000  
41 samples/s, taken from a normal distribution. The signal was then filtered using a Tukey (also known  
42 as tapered cosine) window and delivered through headphones. The rising phase of acoustic noise  
43 amplitude was initiated 0.1-0.5 seconds (taken randomly) before Stimulus 1 vibration onset, and the  
44 falling phase occurred at a random time interval between 0.1 and 0.5 seconds, after the conclusion of  
45 Stimulus 2; in this manner, overall duration of the acoustic stimulus changed on each “*Noise on*” trial  
46 and provided no information about the vibration duration or intensity.

47

### 48 **Experimental design**

49 Each subject went through both an intensity and a duration delayed comparison session, in different  
50 days. The trial structure was the same as the previous delayed comparison tasks, except for the fact  
51 that in half the trials, the tactile stimuli to be judged were accompanied by non-informative acoustic

52 noise played through headphones. Moreover, no visual feedback was presented to subjects after their  
53 response. A total of 1,020 trials were presented at each session.

54

#### 55 **Analysis of data from delayed comparison task with supplementary auditory noise**

56 We first characterized the behavior by using the same procedure as in the purely tactile delayed  
57 comparison task. For the intensity delayed comparison task, we then computed a linear correlation  
58 between the *PSE* values fitted for different *NTD* values, and the actual *NTD* values. The additive  
59 inverse of the regression coefficient, was defined as *duration bias*. Symmetrically for the duration  
60 delayed comparison task, we computed a linear correlation between the *PSE* values fitted for different  
61 *NID* values, and the actual *NID* values. The additive inverse of the regression coefficient, was defined  
62 as *intensity bias*.

63

#### 64 **REFERENCES**

65

- 66 1. Kanai R, Lloyd H, Buetti D, Walsh V. Modality-independent role of the primary auditory  
67 cortex in time estimation. *Exp Brain Res*. 2011;209: 465–471. doi:10.1007/s00221-011-  
68 2577-3
- 69 2. De La Rosa MD, Bausenhardt KM. Multimodal Integration of Interval Duration: Temporal  
70 Ventriloquism or Changes in Pacemaker Rate? *Timing Time Percept*. 2013.  
71 doi:10.1163/22134468-00002015

72
